1 **Functional connectivity-based subtypes of individuals with and without autism spectrum**  
2 **disorder**

3

4 **Amanda K. Easson<sup>a,b</sup>, Zainab Fatima<sup>c</sup>, and Anthony R. McIntosh<sup>a,b</sup>**

5

6 <sup>a</sup>Rotman Research Institute, Baycrest Hospital, Toronto, ON, Canada

7 <sup>b</sup>Department of Psychology, University of Toronto, Toronto, ON, Canada

8 <sup>c</sup>Department of Psychology, Faculty of Health, Sherman Health Sciences Centre, York University, Toronto, ON, Canada

9

10

11 **Corresponding author:**

12 **Amanda Easson, [amanda.easson@mail.utoronto.ca](mailto:amanda.easson@mail.utoronto.ca)**

13 **Rotman Research Institute**

14 **Baycrest Health Sciences**

15 **3560 Bathurst Street, room 348**

16 **Toronto, ON**

17 **M6A 2E1**

18 **Canada**

19

20 **\*The authors have no competing interests to declare.**

21

22

23

24

25

26

27

28

29

30

31

32

33

34

35

36

37 **Abstract**

38

39 Autism spectrum disorder (ASD) is a heterogeneous neurodevelopmental disorder, characterized  
40 by impairments in social communication and restricted, repetitive behaviours. Neuroimaging  
41 studies have shown complex patterns of functional connectivity (FC) in ASD, with no clear  
42 consensus on brain-behaviour relationships or shared patterns of FC with typically developing  
43 controls. Here, we used k-means clustering and multivariate statistical analyses to characterize  
44 distinct FC patterns and FC-behaviour relationships in participants with and without ASD. Two  
45 FC subtypes were identified by the clustering analysis. One subtype was defined by increased FC  
46 within resting-state networks and decreased FC across networks compared to the other subtype.  
47 A separate FC pattern distinguished ASD from controls, particularly within default mode,  
48 cingulo-opercular, sensorimotor, and occipital networks. There was no significant interaction  
49 between subtypes and diagnostic groups. Finally, analysis of FC patterns with behavioural  
50 measures of IQ, social responsiveness and ASD severity showed unique brain-behaviour  
51 relations in each subtype, and a continuum of brain-behavior relations from ASD to controls  
52 within one subtype. These results demonstrate that distinct clusters of FC patterns exist in both  
53 ASD and controls, and that FC subtypes can reveal unique information about brain-behaviour  
54 relationships.

55

56 **Author Summary**

57

58 Autism spectrum disorder (ASD) is a neurodevelopmental disorder, with high variation in the  
59 types of severity of impairments in social communication and restricted, repetitive behaviours.  
60 Neuroimaging studies have shown complex patterns of communication between brain regions, or  
61 functional connectivity (FC), in ASD. Here, we defined two distinct FC patterns and  
62 relationships between FC and behaviour in participants with and without ASD. One subtype was  
63 defined by increased FC within distinct networks of brain regions, and decreased FC between  
64 networks compared to the other subtype. A separate FC pattern distinguished ASD from  
65 controls. The interaction between subtypes and diagnostic groups was not significant. Analysis  
66 of FC patterns with behavioural measures revealed unique information about brain-behaviour  
67 relations in each subtype.

68 **Keywords:** autism spectrum disorder, functional connectivity, clustering, brain-behaviour  
69 relationships, multivariate statistics, resting-state networks

70

71 **Abbreviations:**

72 ABIDE, Autism Brain Image Data Exchange; ADI-R, Autism Diagnostic Interview Revised;  
73 ADOS, Autism Diagnostic Observation Scale; ASD, autism spectrum disorder; BSR, bootstrap  
74 ratio; CN, cerebellar network; COMM, communication; CON, cingulo-opercular network; Cov.  
75 = covariance; DMN, default mode network; FC, functional connectivity; FD, framewise  
76 displacement; FPN, frontoparietal network; ON, occipital network; PCP, Preprocessed  
77 Connectomes Project; PLS, partial least squares; ROI, region of interest; RRBs, restricted and  
78 repetitive behaviours; RSN, resting-state network; SA, social affect; SMN, sensorimotor  
79 network; SRS, Social Responsiveness Scale; SVD, singular value decomposition; TD, typically  
80 developing

81

82

83

84

85

86

87

88

89

90

91

92

93

94

95

96

97

98

## 99 INTRODUCTION

100

101 Autism spectrum disorder (ASD) is a neurodevelopmental disorder that is characterized  
102 by impairments in social cognition as well as restricted and repetitive behaviours (RRBs;  
103 American Psychiatric Association, 2013). ASD is a highly heterogeneous disorder, with a broad  
104 range of the types and severities of behaviours that can be displayed. For instance, verbal and  
105 nonverbal IQ are highly variable in ASD (e.g. Munson et al., 2008), and RRBs can range from  
106 low-level motor stereotypies to higher-order behaviours such as insistence on sameness  
107 (American Psychiatric Association, 2013). It has been proposed that these complex behavioural  
108 features are associated with atypical patterns of functional connectivity (FC). Such theories  
109 include reduced communication between frontal and posterior brain regions (Just et al., 2012),  
110 increased local FC along with reduced long-range FC (Belmonte et al., 2004; Courchesne &  
111 Pierce, 2005), and an abnormal developmental trajectory of FC compared to typically developing  
112 (TD) individuals (Nomi & Uddin, 2015; Uddin et al., 2013b). However, complex patterns of  
113 both increased and decreased FC have been found in neuroimaging studies of ASD, and results  
114 are inconsistent across studies (see Hull et al., 2016; Picci et al., 2016; and Uddin et al., 2013b  
115 for reviews).

116 It is crucial to consider the heterogeneous nature of ASD, both in terms of behavioural  
117 severity and FC profiles. The importance of this consideration is highlighted by the inconsistent  
118 results regarding relationships between FC and behavioural profiles in individuals with ASD in  
119 previous studies (e.g. Keown et al., 2013; Lee et al., 2016; Monk et al., 2009; Uddin et al.,  
120 2013b). Several recent studies that considered the heterogeneity of neurobiological and  
121 behavioural features of ASD have reported novel finding regarding brain-behaviour  
122 relationships. For instance, Hahamy, Behrmann & Malach (2015) found that idiosyncratic  
123 distortions in FC from a “typical” template were related to ASD symptom severity. Nunes et al.  
124 (2018) also reported that incorporation of vertices along the cortical surface into intrinsic  
125 connectivity networks, particularly into default mode and sensorimotor networks, was more  
126 idiosyncratic in ASD and related to ASD symptom severity.

127 Defining subtypes of ASD based on FC metrics has the potential to resolve some of the  
128 current discrepancies in the literature regarding the nature of FC abnormalities in individuals  
129 with this disorder, as well as to shed light on the complex relationships between FC and

130 behaviour, which may differ between subtypes. Previously, ASD subtypes have been defined  
131 based on clusters of social communication behaviours and RRBs (Georgiades et al., 2012),  
132 structural MRI (Hrdlicka et al., 2005), and various neuroanatomical features (Hong et al., 2017),  
133 and FC (Chen et al., 2015). Chen et al. (2015) found two subtypes that differed in terms of ASD  
134 symptom severity. Further, Hong et al. (2017) found that prediction of individual scores on the  
135 Autism Diagnostic Observation Scale (ADOS) greatly improved when subtypes were  
136 considered, compared to considering all ASD participants as one group. Thus, brain-based  
137 subtyping has the potential to elucidate brain-behaviour relationships that are unique to each  
138 subtype, as it could be the case that certain behaviours result from complex interplay between  
139 local and distributed processing in the brain. One limitation of these studies is that they did not  
140 include both ASD and TD participants in the subtyping procedures. Given the heterogeneous  
141 nature of ASD, the inconsistent reports of FC differences between those with and without ASD,  
142 and recent evidence showing a continuum of the relationship between neurobiological features  
143 and subclinical ASD symptoms in healthy controls (Rashid et al., 2018), it is crucial to include  
144 controls in subtyping analyses as well.

145         In the present study, we used a data-driven approach to characterize subtypes based on  
146 distinct clusters of FC in all participants, and to relate FC patterns to specific behavioural profiles  
147 in these subtypes. We first used k-means clustering, an unsupervised machine learning  
148 technique, to define subtypes using functional connections as features, and implemented a  
149 multivariate statistical analysis that, when applied to neuroimaging data, reveals the optimal  
150 relationship between measures of brain activity and experimental design or group membership.  
151 This approach allowed us to determine which connections were reliably different between  
152 subtypes, and between ASD and TD participants. We also used this multivariate approach to  
153 characterize relationships between particular patterns of FC and a set of behaviours. It was  
154 hypothesized that defining FC-based subtypes of ASD and TD participants using data-driven  
155 metrics would reveal unique information about brain-behaviour interactions.

156  
157  
158  
159  
160  
161

## 162 RESULTS

163

### 164 *FC-based subtypes of ASD and TD participants*

165 FC-based subtypes were defined using k-means clustering. The effects of scan site were  
166 regressed out of the FC data; when these effects were not removed, there was a significant  
167 difference in the distribution of scan sites between the two subtypes,  $X^2(4, N=266) = 78.60, p <$   
168  $0.001$ . At this point, subtypes were significantly different in age,  $t(264) = 2.50, p = 0.01$ ; thus,  
169 effects of both site and age were regressed from the data. As it has been recently shown that  
170 despite implementing preprocessing steps that aim to correct for head motion in resting-state  
171 fMRI, residual motion effects can contaminate FC estimates (Ciric et al., 2017), a multivariate  
172 brain-behaviour analysis was performed to determine if there were relationships between FC and  
173 head motion metrics (mean FD and percentage of frames exceeding 0.2mm). There was not a  
174 significant relationship between FC and motion ( $p = 0.57$ ).

175 The optimal number of clusters, as determined by the elbow point criterion, was 2 (Fig.  
176 1A). Using a bootstrapping procedure to evaluate the reliability of the optimal number of  
177 clusters, it was found that the optimal number of clusters was 2 in 500/500 bootstrap samples.  
178 Subtype 1 consisted of 85 ASD participants and 54 TD participants. Subtype 2 consisted of 60  
179 ASD participants and 67 TD participants. Qualitatively, Subtype 1 was defined by stronger FC  
180 between networks, particularly between the DMN and other networks, and weaker FC within  
181 networks relative to Subtype 2 (Fig. 1B).

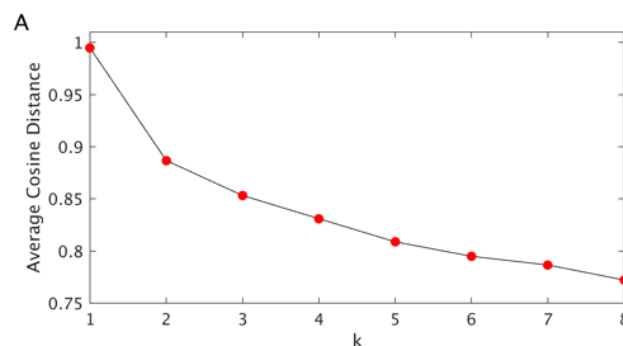

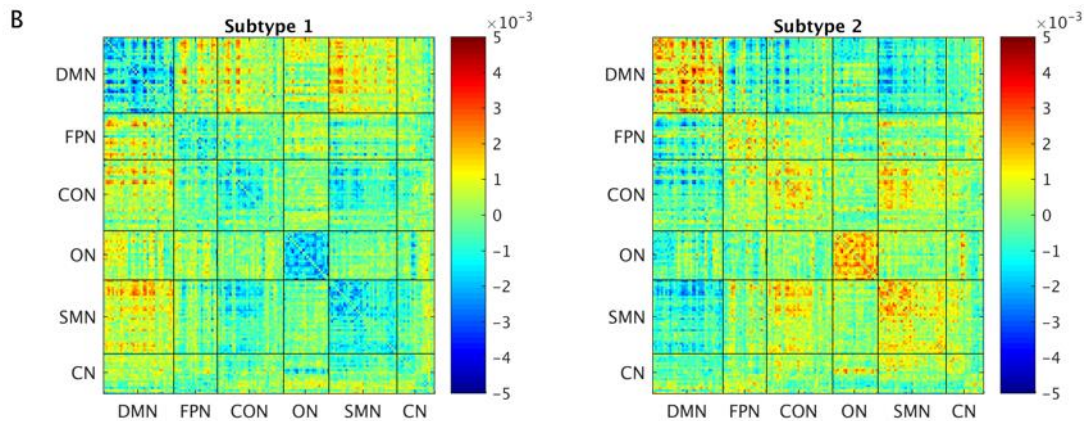

183

184 **Fig. 1:** A) Elbow point plots, indicating that the optimal number of clusters is 2. B) Subtype  
185 centroids. DMN = default mode network; FPN = frontoparietal network; CON = cingulo-  
186 opercular network; ON = occipital network; SMN = sensorimotor network; CN = cerebellar  
187 network.

188

189 Importantly, subtypes did not differ in demographics or behaviour, including IQ, eye  
190 status, medication use, presence of comorbidities, head motion, or the parameters (scan site and  
191 age) that were regressed out of the FC matrices (Supplementary Table 3). While subtypes  
192 differed in ADOS scores, and differences SRS scores approached significance, these differences  
193 were driven by the fact that there were more TD participants with these scores in Subtype 2  
194 compared to Subtype 1. SRS scores did not differ between ASD participants in Subtypes 1 and 2,  
195 and also did not differ between TD participants in Subtypes 1 and 2. ADOS scores did not differ  
196 between ASD participants in Subtypes 1 and 2, but could not be compared for TD participants in  
197 Subtypes 1 and 2, because ADOS scores were only available for 2 TD participants in Subtype 1  
198 and 12 TD participants in Subtype 2.

199

200 Next, we used a multivariate statistical approach to determine differences in FC between  
201 subtypes and between ASD and TD participants. The reliability of these patterns was determined  
202 via bootstrap sampling. A functional connection was considered to be reliable, or stable, if the  
203 absolute value of its bootstrap ratio (BSR) exceeded 2. This analysis revealed two significant  
204 patterns. The first pattern showed stable differences in FC between subtypes ( $p < 0.001$ , 61.07%  
205 of variance explained, Fig. 2A), whereby Subtype 2 was characterized by stronger FC within  
206 resting-state networks, and weaker FC between networks, compared to Subtype 1. The contrast  
expression for this FC pattern (Supplementary Fig. 2) revealed that functional connections with

207 significant positive BSRs, on average, were positive in Subtype 1 and negative in Subtype 2, and  
208 vice versa for negative BSRs. The second pattern revealed a contrast between diagnostic groups  
209 ( $p = 0.02$ , 21.74% of variance explained, Fig. 2B), with a diffuse spatial pattern. The contrast  
210 expression for the second pattern (Supplementary Fig. 3) revealed that functional connections  
211 with significant positive BSRs, on average, were negative in the ASD group and positive in the  
212 TD group, and vice versa for negative BSRs. The third pattern, which revealed a subtype by  
213 diagnosis interaction, was not significant,  $p = 0.92$ . The significance of these spatial patterns  
214 within and between resting-state networks (RSNs) was evaluated using permutation tests (see  
215 Materials and Methods), and is shown in Fig. 3.  
216

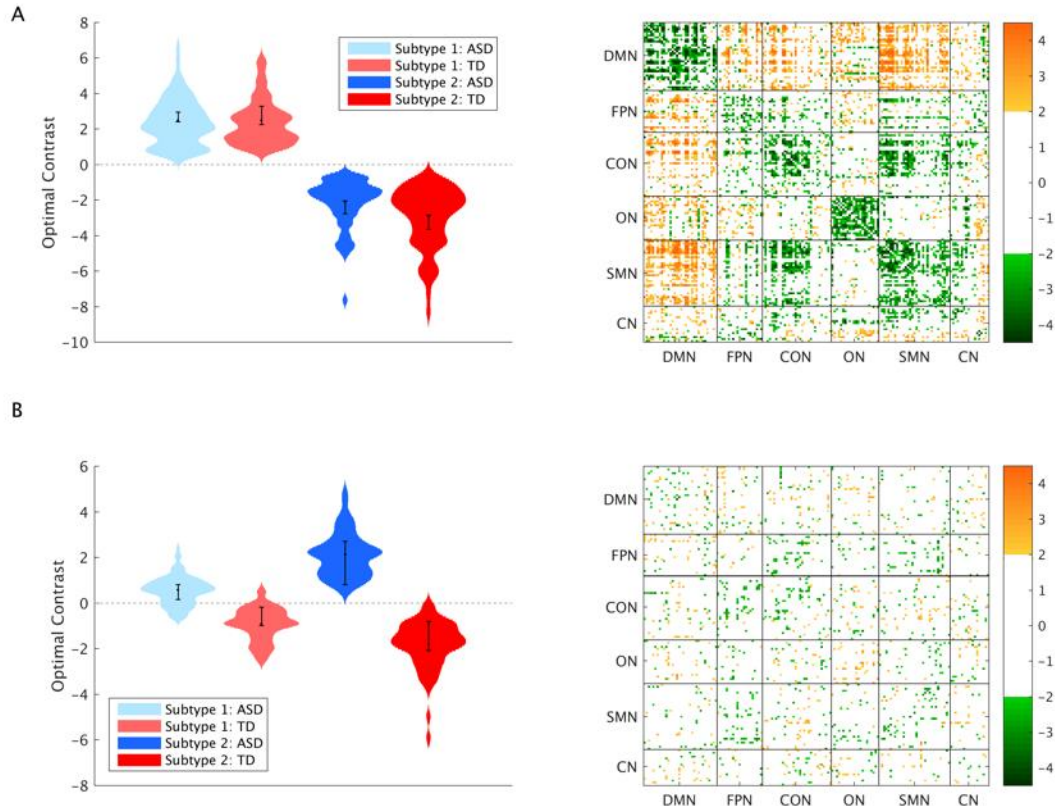

217  
218 **Fig. 2.** Results from the multivariate group analysis. A) First pattern, and B) second pattern, and  
219 the associated BSRs for each connection, at a threshold of  $\pm 2$ . Error bars show 95% confidence  
220 intervals determined through bootstrap resampling.

221



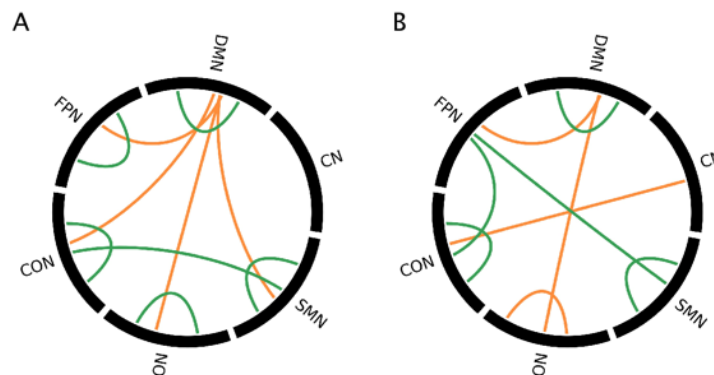

222  
223 **Fig. 3.** Significant contributions of RSN pairs to each pattern for positive and negative BSRs, for  
224 the A) first pattern and B) second pattern from the multivariate group analysis. Orange = positive  
225 BSRs, green = negative BSRs.

### 226 227 *Multivariate analyses of FC-behaviour relationships*

228  
229 A multivariate brain-behaviour analysis was used to assess relationships between FC and  
230 a set of behavioural measures in the two ASD-TD subtypes, including IQ, ADOS scores  
231 (communication (COMM), social affect (SA), and restricted and repetitive behaviours (RRB)),  
232 and scores on the Social Responsiveness scale (SRS). The full set of behavioural measures was  
233 available for 51 participants (49 ASD, 2 TD) in Subtype 1 and 50 (38 ASD, 12 TD) participants  
234 in Subtype 2. ADI-R scores were not included, as only 28 participants in Subtype 1 and 26  
235 participants in Subtype 2 had the full set of behavioural measures including ADI-R scores.  
236 Further, none of the participants with the full set of scores including ADI-R scores were TD  
237 participants.

238 The analysis revealed 3 significant patterns. The first pattern ( $p = 0.03$ , 32.09%  
239 covariance explained) revealed stable relationships between FC and IQ and ADOS RRB scores  
240 in Subtype 1, and stable relationships between FC and all behavioural measures in Subtype 2.  
241 The first brain-behaviour pattern was a contrast between Subtypes 1 and 2 in terms of  
242 relationships with FC and ADOS RRB scores, such that connections that were reliably positively  
243 correlated with ADOS RRB scores in Subtype 1 were negatively correlated in Subtype 2, and  
244 vice versa. The third pattern ( $p = 0.008$ , 10.82% covariance explained) revealed a different  
245 spatial pattern that exhibited stable correlations with IQ and SRS in Subtype 1, and with all  
246 ADOS scores and SRS in Subtype 2. Additionally, there was a contrast between Subtypes 1 and

247 2 in terms of correlations between FC and SRS scores. The seventh pattern ( $p = 0.003$ , 4.45%  
248 covariance explained) revealed a contrast between Subtypes 1 and 2 in terms of correlations  
249 between FC and ADOS communication scores, as well as stable correlations between FC and  
250 ADOS social affect scores in Subtype 1. Overall, it can be seen that connections that show stable  
251 correlations with behaviour are diffuse. Patterns that accounted for more than 10% of the  
252 covariance between FC and behaviour (that is, patterns 1 and 3) are shown in Fig. 4, and the  
253 corresponding contrast expressions are shown in Supplementary Fig. 4 and 5. The stability of  
254 these FC-behaviour relationships within and between RSNs are shown in Fig. 5.

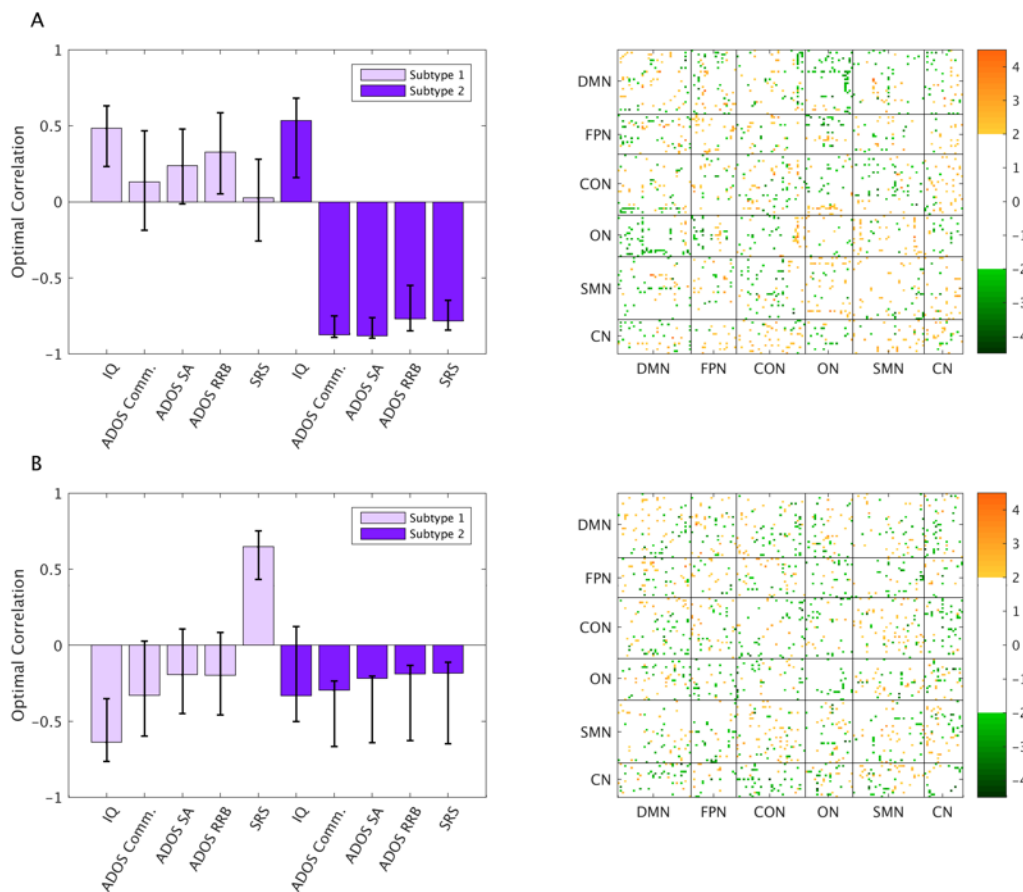

255

256

257 **Fig. 4.** Results from the multivariate brain-behaviour analysis. A) First pattern, and B) third  
258 pattern, and the associated BSRs for each connection, at a threshold of  $\pm 2$ . Error bars show 95%  
259 confidence intervals determined through bootstrap resampling.

260

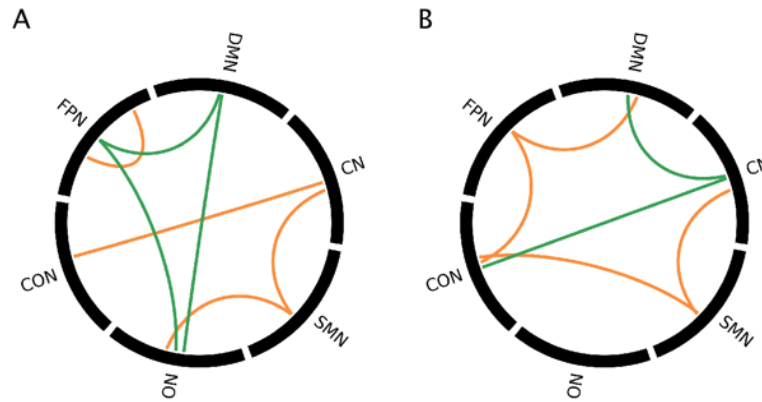

261  
262 **Fig. 5.** Significant contributions of RSN pairs to each pattern for positive and negative BSRs, for  
263 A) first pattern and B) third pattern. Orange = positive BSRs, green = negative BSRs.  
264

265 The relationship between brain and behaviour scores for ASD and TD participants in  
266 Subtype 2 for the first pattern of the multivariate brain-behaviour analysis is shown in Fig. 6. The  
267 continuum of scores for both brain and behaviour variables illustrates that there is a pattern of FC  
268 that co-varies with the severity of behaviours across the autism spectrum and typical  
269 development. This analysis was only performed in Subtype 2, as there were only 2 TD  
270 participants in Subtype 1 who had the full set of behaviour measures.  
271

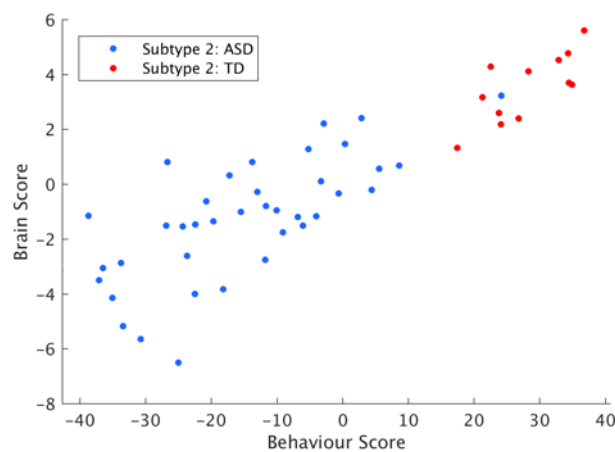

272  
273 **Fig. 6.** Brain and behaviour scores for Subtype 2, from the first pattern of the multivariate brain-  
274 behaviour analysis.  
275

276 We then determined the relationship between the patterns from the multivariate group  
277 analysis and the multivariate brain-behaviour analysis by correlating the brain saliences for each  
278 analysis, and evaluated the significance of these correlations using permutation testing. There  
279 was a significant correlation between the first brain-behaviour pattern and the second group  
280 pattern,  $r = 0.40$ ,  $p < 0.001$ , indicating that the continuum of FC-behaviour relationships was  
281 associated with the diagnostic pattern from the group analysis. The correlations between the  
282 other patterns were not significant: (brain-behaviour pattern 1 and group pattern 1:  $r = -0.06$ ,  $p =$   
283  $0.81$ ; brain-behaviour pattern 3 and group pattern 1:  $r = 0.005$ ,  $p = 0.45$ ; brain-behaviour pattern  
284 3 and group pattern 2:  $r = 0.07$ ,  $p = 0.13$ ).

285

## 286 **DISCUSSION**

287

### 288 *Overview*

289 This study reveals that there are distinct clusters of FC patterns in both ASD and controls.  
290 We characterized network-level differences between subtypes and diagnostic groups, and further  
291 showed that individuals within each subtype exhibit different relationships between FC metrics  
292 and behavioural measures. The continuum of brain and behaviour scores across ASD and TD  
293 participants reveals that FC phenotypes observed in ASD extend to typical development in  
294 relation to behavioural severity.

295

### 296 *Comparison of FC between subtypes and diagnostic groups*

297 Two FC-based subtypes were defined for all participants. When all four groups were  
298 considered in a multivariate analysis (i.e. ASD Subtype 1, ASD Subtype 2, TD Subtype 1, and  
299 TD Subtype 2), the strongest pattern, not surprisingly, was a contrast between subtypes.  
300 Regardless of diagnostic group, Subtype 2 was defined by greater FC within networks and lower  
301 FC between networks, especially between the DMN and other RSNs, compared to Subtype 1.  
302 Connections within networks tended to be positive on average in Subtype 2 and negative in  
303 Subtype 1, indicating reduced interactions among brain regions within these networks in Subtype  
304 1. Further, connections between networks that were lower in Subtype 2 tended to be negative,  
305 but were positive on average in Subtype 1 (Supplementary Fig. 2). As anti-correlations between  
306 resting-state networks are hypothesized to signify the division of labour between brain regions

307 that are involved in different functions (Fransson 2006), and the ability for regions that are  
308 relevant for certain cognitive functions to become activated with concurrent deactivation of  
309 irrelevant regions (Fox et al., 2005; Greicius et al., 2003), these abilities may be affected in  
310 Subtype 1.

311 A second pattern revealed diffuse functional connections that differed between diagnostic  
312 groups in both subtypes. ASD participants exhibited reliable decreases in FC within the SMN,  
313 DMN and CON, but greater FC within the ON. Atypical FC of sensorimotor regions in ASD has  
314 reported in previous studies (Anderson et al., 2011; Mostofsky et al., 2009; Turner et al., 2006).  
315 Thus, despite the broad range of sensorimotor difficulties in ASD (Minshew et al., 1997; Perry et  
316 al., 2007; Whyatt & Craig, 2013), atypical SMN FC may be common across the autism  
317 spectrum. It has been hypothesized that abnormal DMN functioning in ASD relates to decreased  
318 self-referential processing, decreased abilities to redirect attention from external to internal  
319 processing, and difficulties with theory of mind (e.g. Assaf et al., 2010). Various studies have  
320 reported decreased FC between DMN regions in ASD (Assaf et al., 2010; Kennedy &  
321 Courchesne, 2008; Monk et al., 2009; Weng et al., 2010), although hyperconnectivity has also  
322 been reported (Monk et al., 2009; Uddin et al., 2013a). Decreased FC within the CON, which  
323 plays a role in stable set-maintenance (Dosenbach et al., 2007), is line with previous studies that  
324 showed difficulties with set-maintenance in ASD (Kaland, Smith, & Mortensen, 2008; Miller et  
325 al., 2015). Increased FC in the ON is consistent with findings of increased local connectivity in  
326 primary visual regions (Keown et al., 2013) and increased involvement of extrastriate cortex  
327 (Shen et al., 2012) in ASD. Elevated FC in right ventral occipital-temporal cortex in ASD has  
328 been associated with higher social deficits (Chien et al., 2015). Additionally, reliably higher FC  
329 was found between the DMN and FPN, DMN and ON, and CON and CN in ASD participants.  
330 These connections were positive on average in ASD, but negative on average in controls  
331 (Supplementary Fig. 3). Previous studies have also reported reduced negative connectivity in  
332 ASD, which was described as reduced functional segregation of networks (Rudie et al., 2012;  
333 2013a). However, other between-network connections (FPN-CON and FPN-SMN) exhibited a  
334 greater degree of anti-correlation in ASD. The functional significance of decreased anti-  
335 correlations between some resting-state networks, but increased anti-correlations between others,  
336 remains to be explored.

337 The third pattern, showing a subtype by diagnosis interaction, was not significant, thus  
338 revealing additive effects of subtype and diagnosis on FC patterns. Thus, the expression of the  
339 subtypes does not depend on the diagnosis; the manifestation of the subtypes in ASD is not  
340 different from controls.

341

### 342 *Comparison of FC-behaviour relationships between subtypes*

343 Reliable correlations between FC and behaviour were observed both within and between  
344 RSNs for IQ and ADOS RRB scores for Subtype 1, and all behavioural measures for Subtype 2,  
345 showing that similar behavioural profiles can be associated with different functional correlates in  
346 the brain. Previous studies have reported mixed results regarding associations between FC  
347 measures and ASD behavioural measures. For instance, Keown et al. (2013) found that  
348 overconnectivity in posterior brain regions was associated with greater severity ASD severity,  
349 and that frontal underconnectivity was found only in low-severity participants. However, another  
350 study found that ASD severity was correlated with the extent of hyperconnectivity in the salience  
351 network, which includes regions such as the dorsal anterior cingulate cortex and frontoinsula  
352 cortex (Uddin et al., 2013b). Lee et al. (2016) reported overall reduced FC density in ASD, and  
353 found that average interhemispheric FC density and contralateral FC density in a  
354 lingual/parahippocampal gyrus cluster and default mode network regions was negatively  
355 correlated with RRBs. On the other hand, hyperconnectivity between the posterior cingulate  
356 cortex (PCC), a core region of the DMN, and the right parahippocampal gyrus was associated  
357 with more severe RRBs in another study (Monk et al., 2009). Our results highlight the  
358 importance of considering FC-based subtypes when examining brain-behaviour relationships in  
359 individuals with and without ASD. Importantly, individuals in each subtype did not differ  
360 significantly in IQ or SRS scores, and ASD participants in the two subtypes did not differ  
361 significantly in ADOS scores. Thus, there is unique information about FC-based subtypes that is  
362 not accessible by using behaviour alone.

363 The multivariate brain-behaviour analysis supports the idea that instead of being a  
364 categorical diagnosis, ASD should indeed be considered as an extreme of a continuum of both  
365 neurobiological and behavioural features that can also be observed in TD individuals  
366 (Constantino & Todd, 2003; Rashid et al., 2018). In other words, there is normal variation in FC  
367 across both ASD and TD participants (see Fig. 6), but too much of this natural variation is

368 associated with a diagnosis of ASD. This idea is supported by the continuum of brain and  
369 behaviour scores from pattern 1 of the brain-behaviour analysis for Subtype 2, and the significant  
370 correlation between the spatial pattern for this pattern and the second pattern from the group  
371 analysis, that is, the contrast in FC between diagnostic groups. This dimensional approach has  
372 also been reinforced by recent studies that reported novel findings in individuals with ASD by  
373 accounting for the heterogeneity of the relationships between behavioural severity and various  
374 neurobiological features (Hahamy et al., 2015; Nunes et al., 2018). Recently, it has been pointed  
375 out that different features of brain function are variable even among TD individuals, and a  
376 certain feature cannot be considered to be an impairment unless it is accompanied by behavioural  
377 symptoms (Muller & Amaral, 2017). Our results support this idea by showing that some sets of  
378 functional connections are a) similar among subsets of ASD and TD participants, and b)  
379 correlated with behavioural severity. The similarity of FC patterns in ASD and controls has also  
380 been demonstrated in a recent study by Spronk et al. (2018), which demonstrated that resting-  
381 state FC patterns between TD participants and several clinical groups, including ASD, attention  
382 deficit hyperactivity disorder, and schizophrenia, are highly correlated, despite the presence of  
383 clinical symptoms.

384

### 385 *Limitations*

386 One limitation of our study is that we defined subtypes using a single data preprocessing  
387 strategy. It has been proposed that differences in analysis approaches between studies are the  
388 most likely causes of inconsistent results between studies of FC in ASD (Hull et al., 2016). For  
389 instance, it has been shown that global signal regression reduces the relationship between FC and  
390 head motion, but can result in distance-dependent artifacts in FC unless used in combination with  
391 censoring methods (Ciric et al., 2017). Preprocessing strategies such as global signal regression  
392 and low-pass filtering have been shown to affect group differences in FC between participants  
393 with and without ASD (Gotts et al. 2013; Muller et al., 2011). The length of fMRI scans may  
394 also contribute to heterogeneity across studies: it has been suggested that increasing scan lengths,  
395 for instance from 5 to 13 minutes, improves the reliability of FC estimates (Birn et al., 2013). It  
396 is therefore crucial to gain a better understanding of how preprocessing choices and scanning  
397 parameters affect group differences in FC, and to compare FC-based subtypes across different  
398 preprocessing strategies.

399 Subtypes in this study were defined based on FC. The incorporation of additional metrics  
400 may help to further characterize differences between the two subtypes defined in this study. For  
401 instance, recent work has focused on altered dynamic FC “states” in ASD (e.g. Chen et al., 2017;  
402 de Lacy et al., 2017; Rashid et al., 2018). However, as participants’ time series consisted of only  
403 145 time points, characterizing FC states in this dataset was not feasible.

404 Finally, we examined the continuum of brain and behaviour scores across both ASD and  
405 TD participants in Subtype 2; however, ADOS scores were available for only 2 TD participants  
406 in Subtype 1. It will be important for future studies to collect ADOS scores in TD participants to  
407 better characterize the continuum of FC-behaviour relationships across all participants in  
408 multiple subtypes.

409

### 410 *Conclusions*

411 Multivariate analyses of FC-based subtypes highlight the importance of considering the  
412 heterogeneity of FC patterns and measures of behaviour in resting-state studies, and reveal the  
413 continuum of brain-behaviour relationships in individuals with and without ASD. As subtypes  
414 exhibited different relationships between FC and behavioural severity, it will be important to  
415 determine if individuals with ASD in different subtypes exhibit unique responses to treatments  
416 and behavioural therapies.

417

## 418 **MATERIALS AND METHODS**

419

### 420 *Participants*

421 Resting-state fMRI data from 145 males with ASD and 121 TD males were acquired  
422 from the Preprocessed Connectomes Project (PCP; Craddock et al., 2015;  
423 <http://www.preprocessed-connectomes-project.org/abide>). The data had been obtained from the  
424 Autism Brain Imaging Data Exchange (ABIDE; Di Martino et al., 2014;  
425 [http://www.fcon\\_1000.projects.nitrc.org/indi/abide](http://www.fcon_1000.projects.nitrc.org/indi/abide)) and preprocessed using the Connectome  
426 Computation System pipeline (Xu et al., 2015). Participants were excluded if their age was  
427 greater than 40, full scale IQ was less than 75, mean framewise displacement (FD) during the  
428 resting-state fMRI scan was greater than 0.20mm, percentage of data points exceeding 0.20mm  
429 was greater than 20%, and/or scans were rated as good by less than 2 (out of 3 raters) as per the



430 ABIDE quality assessment protocol (<http://preprocessed-connectomes->  
 431 [project.org/abide/quality\\_assessment.html](http://project.org/abide/quality_assessment.html)). Groups were matched for age, IQ, mean framewise  
 432 displacement and the percentage of data points exceeding 0.20mm. ASD diagnoses were  
 433 confirmed using the Autism Diagnostic Observation Scale (ADOS; Lord et al., 2000) and/or the  
 434 Autism Diagnostic Interview-Revised (ADI-R; Lord et al., 1994). Participant characteristics are  
 435 shown in Table 1, along with the number of scores that were available for ADOS, ADI-R and  
 436 SRS scores for ASD participants if these scores were not available for all 145 participants.  
 437 Participant characteristics for each site are described in Supplementary Table 1.

438

439 **Table 1: Participant characteristics**

| Variable           | ASD<br>Mean $\pm$ SD<br>[range]    | TD<br>Mean $\pm$ SD<br>[range]     | Significance                     |
|--------------------|------------------------------------|------------------------------------|----------------------------------|
| N                  | 145                                | 121                                |                                  |
| Age                | 16.47 $\pm$ 6.46<br>[7.13 – 39.10] | 16.03 $\pm$ 5.70<br>[6.47 – 31.78] | $t(264) = 0.58, p = 0.56$        |
| IQ                 | 107.57 $\pm$ 16.32<br>[76 – 148]   | 110.08 $\pm$ 11.61<br>[80 – 133]   | $t(264) = -1.43, p = 0.15$       |
| Mean FD            | 0.07 $\pm$ 0.04<br>[0.02 – 0.19]   | 0.07 $\pm$ 0.03<br>[0.03 – 0.19]   | $t(264) = 1.32, p = 0.19$        |
| Percent FD > 0.2mm | 4.69 $\pm$ 5.27<br>[0 – 19.33]     | 3.92 $\pm$ 1.29<br>[0 – 19.33]     | $t(264) = 1.29, p = 0.20$        |
| Handedness         | 120 RH<br>21 LH                    | 109 RH<br>10 LH                    | $X^2(1, N=266) = 0.52, p = 0.13$ |
| Eye status         | 121 open<br>24 closed              | 95 open<br>26 closed               | $X^2(1, N=266) = 1.38, p = 0.35$ |

|                    |                                                         |                                                         |                                  |
|--------------------|---------------------------------------------------------|---------------------------------------------------------|----------------------------------|
| Scan site          | NYU: 59<br>SDSU: 11<br>TRINITY: 18<br>UM: 26<br>USM: 31 | NYU: 52<br>SDSU: 10<br>TRINITY: 16<br>UM: 29<br>USM: 14 | $X^2(4, N=266) = 5.07, p = 0.28$ |
| Medication use     | 27 yes<br>86 no<br>32 unknown                           | 0 yes<br>106 no<br>15 unknown                           | N/A                              |
| Comorbidities      | 28 yes<br>117 no/unknown                                | 0 yes<br>121 no/unknown                                 | N/A                              |
| ADOS Total         | $11.69 \pm 3.68$<br>[5 – 22]<br>(N = 118)               | $1.14 \pm 1.17$<br>[0 – 4]<br>(N = 14)                  | $t(130) = 10.64, p < 0.001$      |
| ADOS Communication | $3.89 \pm 1.55$<br>[0 – 8]<br>(N = 100)                 | $0.50 \pm 0.65$<br>[0 – 2]<br>(N = 14)                  | $t(112) = 8.06, p < 0.001$       |
| ADOS Social        | $7.89 \pm 2.81$<br>[2 – 14]<br>(N = 100)                | $0.64 \pm 0.84$<br>[0 – 3]<br>(N = 14)                  | $t(112) = 9.56, p < 0.001$       |
| ADOS RRB           | $2.04 \pm 1.46$<br>[0 – 7]<br>(N = 98)                  | $0.07 \pm 0.27$<br>[0 – 1]<br>(N = 14)                  | $t(110) = 5.00, p < 0.001$       |
| ADI-R Social       | $19.07 \pm 5.44$<br>[7 – 30]<br>(N = 108)               | N/A                                                     | N/A                              |
| ADI-R Verbal       | $15.38 \pm 4.36$<br>[2 – 25]                            | N/A                                                     | N/A                              |

|           |                                       |                                       |                             |
|-----------|---------------------------------------|---------------------------------------|-----------------------------|
|           | (N = 109)                             |                                       |                             |
| ADI-R RRB | 5.66 ± 2.60<br>[0 – 12]<br>(N = 109)  | N/A                                   | N/A                         |
| SRS       | 92.56 ± 31.00<br>[26-164]<br>(N = 89) | 20.59 ± 12.43<br>[1 – 56]<br>(N = 49) | $t(136) = 15.56, p < 0.001$ |

440

441 ***fMRI Preprocessing***

442 Data from five sites (New York University Lagone Medical Center, University of Utah  
443 School of Medicine, San Diego State University, Trinity Centre for Health Sciences, and  
444 University of Michigan) using a TR of 2000ms were included. The proportion of ASD compared  
445 to TD subjects was not significantly different across sites,  $X^2(4, N=266) = 5.07, p = 0.28$ . Written  
446 informed consent or assent was obtained for all participants in accordance with respective  
447 institutional review boards. Additional information about scanner types and parameters can be  
448 found on the ABIDE website ([http://www.fcon\\_1000.projects.nitrc.org/indi/abide](http://www.fcon_1000.projects.nitrc.org/indi/abide)). The CCS  
449 preprocessing steps, which had been carried out as part of the Preprocessed Connectomes  
450 Project, were as follows: dropping the first 4 volumes, removing and interpolating temporal  
451 spikes, slice timing correction, motion correction, brain mask creation, 4D global mean-based  
452 intensity normalization, boundary-based registration of functional to anatomical images,  
453 anatomical segmentation of grey matter, white matter and cerebrospinal fluid, nuisance  
454 parameter regression (including 24 motion parameters, white matter and CSF signals, linear and  
455 quadratic trends, and the global signal), bandpass filtering (0.01 to 0.1Hz), and registering  
456 functional images to the MNI template. The final preprocessed time series for each subject were  
457 obtained from the Preprocessed Connectomes Project. We chose to use data that had the global  
458 signal regressed out, as this step has been shown to help mitigate differences across multiple sites  
459 (Power et al., 2014). Further, it has been shown recently that global signal regression attenuates  
460 artefactual changes in BOLD signal that are introduced by framewise displacement (Byrge &  
461 Kennedy, 2017). It should also be noted that without global signal regression, FC-based subtypes  
462 differed in head motion (both mean framewise displacement ( $p < 0.001$ ) and percentage of

463 frames above 0.2mm ( $p < 0.001$ ). The time series of 160 4.5mm spherical regions of interest  
464 (ROIs) from the Dosenbach atlas (Dosenbach et al., 2010) were obtained (see Supplementary  
465 Table 2 and Supplementary Fig. 1). Regions in this atlas were selected from meta-analyses of  
466 task-related fMRI studies and categorized into six different resting-state networks (RSNs): the  
467 default mode network (DMN), frontoparietal network (FPN), cingulo-opercular network (CON),  
468 occipital network (ON), sensorimotor network (SMN), and cerebellar network (CN). Additional  
469 details of the fMRI preprocessing steps can be found on the PCP website  
470 (<http://www.preprocessed-connectomes-project.org/abide>).

471

### 472 ***Functional connectivity***

473 Each subject's fMRI time series was truncated to 145 time points, which was the  
474 minimum number of time points across subjects. FC was defined by Fisher z-transformed  
475 Pearson correlations for each ROI pair across all time points for each participant. The effects of  
476 age and acquisition site (represented as a Helmert basis) were regressed out of the FC matrices.

477

### 478 ***K-means Clustering***

479 K-means clustering was used to define subtypes distinct FC patterns. The lower triangle  
480 of each participant's FC matrix was used, such that the matrix for k-means was in the form  
481 subjects x FC. The k-means algorithm begins with an initialization of  $k$  centroids. Then, in the  
482 *assignment* step, each participant is assigned to the closest centroid using the cosine distance,  
483 defined as one minus the cosine of the included angle between each subjects' FC values and each  
484 cluster's centroids, which are treated as vectors. Next, in the *centroid update* step, new centroids  
485 are defined as the mean of the data points that are currently assigned to that centroid. These two  
486 steps are repeated iteratively until convergence, when cluster assignments no longer change.

487 The "elbow point" criterion was used to determine the optimal number of clusters. To  
488 determine the elbow point, the average cosine distance between a cluster's centroids and the FC  
489 values of participants assigned to that particular cluster is calculated for each cluster, then  
490 averaged across clusters to obtain a single distance metric for each value of  $k$ . These distances  
491 are then plotted as a function of  $k$ , and the "elbow" is defined as the value of  $k$  where the change  
492 in the rate of decrease in distance is sharpest. Values from  $k = 2$  to  $k = 8$  were tested (but also  
493 included  $k = 1$  in the elbow point plot as a reference point). Further, we evaluated the reliability

494 of the number of clusters using bootstrap resampling. Fifty percent of the sample was selected at  
495 random, and were grouped into subtypes using the k-means algorithm for values of k from 2 to 8.  
496 The elbow criterion was then used to select the ideal value of k for the bootstrap sample. This  
497 process was repeated 500 times to determine the reliability of the optimal number of clusters.

498

### 499 *Partial Least Squares*

500 Partial least squares (PLS) is a multivariate statistical technique that is used to optimally  
501 relate brain activity to experimental design or group membership in the form of latent variables  
502 (McIntosh et al., 1996; McIntosh & Lobaugh, 2004; Krishnan et al., 2011). PLS software, which  
503 is implemented in Matlab, is available for download from [research.baycrest.org/pls-software](http://research.baycrest.org/pls-software). In  
504 *mean-centering PLS*, patterns relating a matrix of brain variables (in the form subjects x brain  
505 variables) and group membership are calculated. For this study, the brain variables were the FC  
506 values in the lower triangle of each subject's FC matrix (12720 connections). Mean-centering  
507 PLS was used to examine differences in FC between subtypes and between ASD and TD  
508 participants.

509 Using singular value decomposition (SVD), orthogonal patterns that express the maximal  
510 covariance between the brain variables and group membership are computed. The resulting  
511 patterns are sorted in order of the proportion of covariance between the brain and  
512 design/behaviour variables that the pattern accounts for, with the first pattern accounting for the  
513 most covariance. Each pattern consists of saliences (weights) and a singular value. The brain  
514 saliences indicate which brain variables (in this case, functional connections) best characterize  
515 the relationship between the brain variables and group differences. Design saliences indicate the  
516 group differences profiles that best characterize this relationship. Singular values indicate the  
517 proportion of covariance between the brain and design matrices that each pattern accounts for.  
518 Brain scores, which represent each subject's contribution to each brain salience, are calculated  
519 by multiplying the original matrix of brain variables by the brain salience.

520 In *behaviour PLS*, a matrix of behaviour variables is also included in the analysis to  
521 determine design-dependent (in this case, group-dependent) relationships between the brain  
522 variables and behaviour. For this study, behavioural PLS was used to examine associations  
523 between FC and a set of behavioural variables including IQ, ADOS scores (communication,  
524 social affect, and RRBs), and scores on the Social Responsiveness Scale (SRS) in each subtype.

525           The statistical significance of each pattern was determined using permutation testing. For  
526 this procedure, the rows (participants) of the matrix of brain variables are reshuffled, and new  
527 singular values are obtained using SVD. In this study, this procedure was repeated 1000 times to  
528 create a distribution of singular values. The p-value associated with the original singular value is  
529 defined as the proportion of singular values from the sampling distribution that are greater than  
530 the original singular value, thus representing the probability of obtaining a singular value larger  
531 than the original value under the null hypothesis that there is no association between the brain  
532 variables and group membership.

533           In addition to determining the statistical significance of each pattern, the reliability of the  
534 brain saliences can also be determined by utilizing a bootstrapping procedure. Bootstrap samples  
535 are generated by randomly sampling subjects with replacement, while ensuring that group  
536 membership is maintained. In this study, 500 bootstrap samples were generated. Creating  
537 bootstrap samples allows one to determine which brain variables are stable, regardless of which  
538 participants are included in the analysis. The bootstrap ratio (BSR), defined as the ratio of the  
539 brain salience to the standard error of the salience (as estimated by the bootstrap procedure), is a  
540 measure of this stability. Reliable connections were defined as those that surpassed a BSR  
541 threshold of  $\pm 2.0$ , which corresponds roughly to a 95% confidence interval.

542           As FC values can take on positive or negative values, positive BSRs could correspond to  
543 either stronger positive or weaker negative connectivity in one group compared to the other, and  
544 negative BSRs could indicate weaker positive or stronger negative connectivity. Thus,  
545 expressions of FC PLS contrasts were generated for each group. Positive expressions were  
546 generated by averaging connections (Fisher z-transformed Pearson correlation coefficients) that  
547 had BSRs greater than 2 across all participants in each group. A similar procedure was  
548 performed for negative expressions, that is, for connections showing BSRs less than -2.

549           In addition to assessing the contribution of each individual connection to the group  
550 differences, we were interested in determining the extent to which network-level FC, both within  
551 and between RSNs, contributed to the group differences. This was of particular interest due to  
552 hypotheses that ASD may be characterized by atypical FC within and between networks (e.g.  
553 Hull et al., 2016; Rudie & Dapretto, 2013b). To assess the relative contributions of each RSN to  
554 the spatial patterns, the BSR-thresholded spatial maps (i.e. adjacency matrices in the form  
555 connections x connections) were separated into positive BSRs and negative BSRs. These maps

556 were thresholded such that connections with a BSR less than 2 but greater than -2 were set to 0.  
557 Positive BSRs greater than 2 were set to 1, and negative BSRs less than -2 were set to -1. All  
558 thresholded BSRs within each pair of networks were then averaged to obtain a 6x6 matrix  
559 showing the average contribution of each network pair to the spatial pattern, separately for  
560 positive and negative BSRs. To assess the significance of these contributions, the order of  
561 connections in the BSR thresholded matrices was permuted while keeping the RSN labels the  
562 same, and then the above procedure was repeated to calculate the RSN contributions. This  
563 process was repeated 1000 times to obtain a distribution of average contribution values for each  
564 RSN pair. Then, the significance of the original contribution is defined as the proportion of  
565 contribution values from the sampling distribution that are greater than or equal to the original  
566 value.

567

## 568 *2.6. Data visualization*

569 Connectivity circle plots were created using the `plot_connectivity_circle` function from  
570 the open-source MNE software package implemented in Python (Gramfort et al., 2013; 2014).  
571 All other figures were created using Matlab (MATLAB 8.6.0 (R2015b), MathWorks, Natick,  
572 MA). Violin plots were created using the `distributionPlot.m` function (Jonas 2017).

573

574

## 575 **ACKNOWLEDGEMENTS**

576

577 The authors thank Bratislav Misic and Sam Doesburg for helpful discussions, and the  
578 contributors to the Autism Brain Imaging Exchange and Preprocessed Connectomes project.

579 This work was supported by an Ontario Graduate Scholarship (OGS), Mynne & Harold  
580 Soupcoff Fellowship, and Finkler Graduate Student Fellowship to A.K. Easson.

581

582

583

584

585

586

587 **REFERENCES**

588

589 American Psychiatric Association (2013). Diagnostic and statistical manual of mental disorders  
590 (5<sup>th</sup> ed.). Washington, DC: Author.

591

592 Anderson, J. S., Druzgal, T. J., Froehlich, A., DuBray, M. B., Lange, N., Alexander, A. L., et al.  
593 (2011). Decreased interhemispheric functional connectivity in autism. *Cereb Cortex*, 21(5),  
594 1134-1146. <http://dx.doi.org/10.1093/cercor/bhq190>

595

596 Assaf, M., Jagannathan, K., Calhoun, V. D., Miller, L., Stevens, M. C., Sahl, R., et al. (2010).  
597 Abnormal functional connectivity of default mode sub-networks in autism spectrum disorder  
598 patients. *Neuroimage*, 53(1), 247-256. <http://dx.doi.org/10.1016/j.neuroimage.2010.05.067>

599

600 Belmonte, M. K., Allen, G., Beckel-Mitchener, A., Boulanger, L. M., Carper, R. A., & Webb, S.  
601 J. (2004). Autism and abnormal development of brain connectivity. *J Neurosci*, 24(42), 9228-  
602 9231. <http://dx.doi.org/10.1523/JNEUROSCI.3340-04.2004>

603

604 Birn, R. M., Molloy, E. K., Patriat, R., Parker, T., Meier, T. B., Kirk, G. R., . . . Prabhakaran, V.  
605 (2013). The effect of scan length on the reliability of resting-state fMRI connectivity estimates.  
606 *Neuroimage*, 83, 550-558. doi:10.1016/j.neuroimage.2013.05.099

607

608 Byrge, L., & Kennedy, D. P. (2017). Identifying and characterizing systematic temporally-lagged  
609 BOLD artifacts. *Neuroimage*, 171, 376-392. doi:10.1016/j.neuroimage.2017.12.082

610

611 Chen, C., Bailey, B., & Muller, R.A. (2015). *Towards autism subtypes? Unsupervised machine*  
612 *learning using fcMRI features*. Oral Presentation at the Organization for Human Brain Mapping  
613 Annual Meeting, Honolulu, HI, USA.

614

615 Chen, H., Nomi, J. S., Uddin, L. Q., Duan, X., & Chen, H. (2017). Intrinsic functional  
616 connectivity variance and state-specific under-connectivity in autism. *Hum Brain Mapp*.  
617 <http://dx.doi.org/10.1002/hbm.23764>



618  
619 Chien, H. Y., Lin, H. Y., Lai, M. C., Gau, S. S., & Tseng, W. Y. (2015). Hyperconnectivity of  
620 the Right Posterior Temporo-parietal Junction Predicts Social Difficulties in Boys with Autism  
621 Spectrum Disorder. *Autism Res*, 8(4), 427-441. doi:10.1002/aur.1457  
622  
623 Ciric, R., Wolf, D. H., Power, J. D., Roalf, D. R., Baum, G. L., Ruparel, K., . . . Satterthwaite, T.  
624 D. (2017). Benchmarking of participant-level confound regression strategies for the control of  
625 motion artifact in studies of functional connectivity. *Neuroimage*, 154, 174-187.  
626 doi:10.1016/j.neuroimage.2017.03.020  
627  
628 Constantino, J. N., & Todd, R. D. (2003). Autistic traits in the general population: a twin study.  
629 *Arch Gen Psychiatry*, 60(5), 524-530. doi:10.1001/archpsyc.60.5.524  
630  
631 Courchesne, E., & Pierce, K. (2005). Why the frontal cortex in autism might be talking only to  
632 itself: local over-connectivity but long-distance disconnection. *Curr Opin Neurobiol*, 15(2), 225-  
633 230. <http://dx.doi.org/10.1016/j.conb.2005.03.001>  
634  
635 Craddock, C., Benhajali, Y., Chu, C., Chouinard, F., Evans, A., Jakab, A., et al. (2013). The  
636 Neuro Bureau Preprocessing Initiative: open sharing of preprocessed neuroimaging data and  
637 derivatives. In *Neuroinformatics 2013, Stockholm, Sweden*.  
638  
639 de Lacy, N., Doherty, D., King, B. H., Rachakonda, S., & Calhoun, V. D. (2017). Disruption to  
640 control network function correlates with altered dynamic connectivity in the wider autism  
641 spectrum. *Neuroimage Clin*, 15, 513-524. doi:10.1016/j.nicl.2017.05.024  
642  
643 Di Martino, A., Yan, C. G., Li, Q., Denio, E., Castellanos, F. X., Alaerts, K., et al. (2014). The  
644 autism brain imaging data exchange: towards a large-scale evaluation of the intrinsic brain  
645 architecture in autism. *Mol Psychiatry*, 19(6), 659-667. <http://dx.doi.org/10.1038/mp.2013.78>  
646

647 Dosenbach, N. U., Fair, D. A., Miezin, F. M., Cohen, A. L., Wenger, K. K., Dosenbach, R. A., . . .  
648 . Petersen, S. E. (2007). Distinct brain networks for adaptive and stable task control in humans.  
649 *Proc Natl Acad Sci U S A*, *104*(26), 11073-11078. doi:10.1073/pnas.0704320104  
650  
651 Dosenbach, N. U., Nardos, B., Cohen, A. L., Fair, D. A., Power, J. D., Church, J. A., et al.  
652 (2010). Prediction of individual brain maturity using fMRI. *Science*, *329*(5997), 1358-1361.  
653 <http://dx.doi.org/10.1126/science.1194144>  
654  
655 Fox, M. D., Snyder, A. Z., Vincent, J. L., Corbetta, M., Van Essen, D. C., & Raichle, M. E.  
656 (2005). The human brain is intrinsically organized into dynamic, anticorrelated functional  
657 networks. *Proc Natl Acad Sci U S A*, *102*(27), 9673-9678.  
658 <http://dx.doi.org/10.1073/pnas.0504136102>  
659  
660 Fransson, P. (2006). How default is the default mode of brain function? Further evidence from  
661 intrinsic BOLD signal fluctuations. *Neuropsychologia*, *44*(14), 2836-2845.  
662 <http://dx.doi.org/10.1016/j.neuropsychologia.2006.06.017>  
663  
664 Georgiades, S., Szatmari, P., Boyle, M., Hanna, S., Duku, E., Zwaigenbaum, L., et al. (2013).  
665 Investigating phenotypic heterogeneity in children with autism spectrum disorder: a factor  
666 mixture modeling approach. *J Child Psychol Psychiatry*, *54*(2), 206-215.  
667 <http://dx.doi.org/10.1111/j.1469-7610.2012.02588.x>  
668  
669 Gotts, S. J., Saad, Z. S., Jo, H. J., Wallace, G. L., Cox, R. W., & Martin, A. (2013). The perils of  
670 global signal regression for group comparisons: a case study of Autism Spectrum Disorders.  
671 *Front Hum Neurosci*, *7*, 356. doi:10.3389/fnhum.2013.00356  
672  
673 Gramfort, A., Luessi, M., Larson, E., Engemann, D. A., Strohmeier, D., Brodbeck, C., . . .  
674 Hamalainen, M. S. (2014). MNE software for processing MEG and EEG data. *Neuroimage*, *86*,  
675 446-460. doi:10.1016/j.neuroimage.2013.10.027  
676

677 Gramfort, A., Luessi, M., Larson, E., Engemann, D. A., Strohmeier, D., Brodbeck, C., . . .  
678 Hamalainen, M. S. (2014). MNE software for processing MEG and EEG data. *Neuroimage*, *86*,  
679 446-460. doi:10.1016/j.neuroimage.2013.10.027  
680  
681 Greicius, M. D., Krasnow, B., Reiss, A. L., & Menon, V. (2003). Functional connectivity in the  
682 resting brain: a network analysis of the default mode hypothesis. *Proc Natl Acad Sci U S A*,  
683 *100*(1), 253-258. <http://dx.doi.org/10.1073/pnas.0135058100>  
684  
685 Hahamy, A., Behrmann, M., & Malach, R. (2015). The idiosyncratic brain: distortion of  
686 spontaneous connectivity patterns in autism spectrum disorder. *Nat Neurosci*, *18*(2), 302-309.  
687 <http://dx.doi.org/10.1038/nn.3919>  
688  
689 Hong, S. J., Valk, S. L., Di Martino, A., Milham, M. P., & Bernhardt, B. C. (2017).  
690 Multidimensional Neuroanatomical Subtyping of Autism Spectrum Disorder. *Cereb Cortex*, 1-  
691 11. doi:10.1093/cercor/bhx229  
692  
693 Hrdlicka, M., Dudova, I., Beranova, I., Lisy, J., Belsan, T., Neuwirth, J., et al. (2005). Subtypes  
694 of autism by cluster analysis based on structural MRI data. *Eur Child Adolesc Psychiatry*, *14*(3),  
695 138-144. <http://dx.doi.org/10.1007/s00787-005-0453-z>  
696  
697 Hull, J. V., Jacokes, Z. J., Torgerson, C. M., Irimia, A., & Van Horn, J. D. (2016). Resting-State  
698 Functional Connectivity in Autism Spectrum Disorders: A Review. *Front Psychiatry*, *7*, 205.  
699 <http://dx.doi.org/10.3389/fpsy.2016.00205>  
700  
701 Jonas (2017). Violin Plots for plotting multiple distributions (distributionPlot.m)  
702 ([https://www.mathworks.com/matlabcentral/fileexchange/23661-violin-plots-for-plotting-](https://www.mathworks.com/matlabcentral/fileexchange/23661-violin-plots-for-plotting-multiple-distributions--distributionplot-m-)  
703 [multiple-distributions--distributionplot-m-](https://www.mathworks.com/matlabcentral/fileexchange/23661-violin-plots-for-plotting-multiple-distributions--distributionplot-m-)). MATLAB Central File Exchange. Retrieved 17 May  
704 2018.  
705

- 706 Just, M. A., Keller, T. A., Malave, V. L., Kana, R. K., & Varma, S. (2012). Autism as a neural  
707 systems disorder: a theory of frontal-posterior underconnectivity. *Neurosci Biobehav Rev*, *36*(4),  
708 1292-1313. <http://dx.doi.org/10.1016/j.neubiorev.2012.02.007>  
709
- 710 Kaland, N., Smith, L., & Mortensen, E. L. (2008). Brief report: cognitive flexibility and focused  
711 attention in children and adolescents with Asperger syndrome or high-functioning autism as  
712 measured on the computerized version of the Wisconsin Card Sorting Test. *J Autism Dev Disord*,  
713 *38*(6), 1161-1165. doi:10.1007/s10803-007-0474-1  
714
- 715 Kennedy, D. P., & Courchesne, E. (2008). The intrinsic functional organization of the brain is  
716 altered in autism. *Neuroimage*, *39*(4), 1877-1885.  
717 <http://dx.doi.org/10.1016/j.neuroimage.2007.10.052>  
718
- 719 Keown, C. L., Shih, P., Nair, A., Peterson, N., Mulvey, M. E., & Muller, R. A. (2013). Local  
720 functional overconnectivity in posterior brain regions is associated with symptom severity in  
721 autism spectrum disorders. *Cell Rep*, *5*(3), 567-572.  
722 <http://dx.doi.org/10.1016/j.celrep.2013.10.003>  
723
- 724 Krishnan, A., Williams, L. J., McIntosh, A. R., & Abdi, H. (2011). Partial Least Squares (PLS)  
725 methods for neuroimaging: a tutorial and review. *Neuroimage*, *56*(2), 455-475.  
726 <http://dx.doi.org/10.1016/j.neuroimage.2010.07.034>  
727
- 728 Lee, J. M., Kyeong, S., Kim, E., & Cheon, K. A. (2016). Abnormalities of Inter- and Intra-  
729 Hemispheric Functional Connectivity in Autism Spectrum Disorders: A Study Using the Autism  
730 Brain Imaging Data Exchange Database. *Front Neurosci*, *10*, 191.  
731 <http://dx.doi.org/10.3389/fnins.2016.00191>  
732
- 733 Lord, C., Risi, S., Lambrecht, L., Cook, E. H., Jr., Leventhal, B. L., DiLavore, P. C., et al.  
734 (2000). The autism diagnostic observation schedule-generic: a standard measure of social and  
735 communication deficits associated with the spectrum of autism. *J Autism Dev Disord*, *30*(3),  
736 205-223.

737

738 Lord, C., Rutter, M., & Le Couteur, A. (1994). Autism Diagnostic Interview-Revised: a revised  
739 version of a diagnostic interview for caregivers of individuals with possible pervasive  
740 developmental disorders. *J Autism Dev Disord*, 24(5), 659-685.

741

742 McIntosh, A. R., Bookstein, F. L., Haxby, J. V., & Grady, C. L. (1996). Spatial pattern analysis  
743 of functional brain images using partial least squares. *Neuroimage*, 3(3 Pt 1), 143-157.

744 <http://dx.doi.org/10.1006/nimg.1996.0016>

745

746 McIntosh, A. R., & Lobaugh, N. J. (2004). Partial least squares analysis of neuroimaging data:  
747 applications and advances. *Neuroimage*, 23 Suppl 1, S250-263.

748 <http://dx.doi.org/10.1016/j.neuroimage.2004.07.020>

749

750 Miller, H. L., Ragozzino, M. E., Cook, E. H., Sweeney, J. A., & Mosconi, M. W. (2015).

751 Cognitive set shifting deficits and their relationship to repetitive behaviors in autism spectrum  
752 disorder. *J Autism Dev Disord*, 45(3), 805-815. doi:10.1007/s10803-014-2244-1

753

754 Minschew, N. J., Goldstein, G., & Siegel, D. J. (1997). Neuropsychologic functioning in autism:  
755 profile of a complex information processing disorder. *J Int Neuropsychol Soc*, 3(4), 303-316.

756

757 Monk, C. S., Peltier, S. J., Wiggins, J. L., Weng, S. J., Carrasco, M., Risi, S., & Lord, C. (2009).

758 Abnormalities of intrinsic functional connectivity in autism spectrum disorders. *Neuroimage*,  
759 47(2), 764-772. <http://dx.doi.org/10.1016/j.neuroimage.2009.04.069>

760

761 Muller, R. A., & Amaral, D. G. (2017). Editorial: Time to give up on Autism Spectrum

762 Disorder? *Autism Res*, 10(1), 10-14. doi:10.1002/aur.1746

763

764 Munson, J., Dawson, G., Sterling, L., Beauchaine, T., Zhou, A., Elizabeth, K., et al. (2008).

765 Evidence for latent classes of IQ in young children with autism spectrum disorder. *Am J Ment*  
766 *Retard*, 113(6), 439-452. <http://dx.doi.org/10.1352/2008.113:439-452>

767

768 Mostofsky, S. H., Powell, S. K., Simmonds, D. J., Goldberg, M. C., Caffo, B., & Pekar, J. J.  
769 (2009). Decreased connectivity and cerebellar activity in autism during motor task performance.  
770 *Brain*, 132(Pt 9), 2413-2425. <http://dx.doi.org/10.1093/brain/awp088>  
771

772 Muller, R. A., Shih, P., Keehn, B., Deyoe, J. R., Leyden, K. M., & Shukla, D. K. (2011).  
773 Underconnected, but how? A survey of functional connectivity MRI studies in autism spectrum  
774 disorders. *Cereb Cortex*, 21(10), 2233-2243. <http://dx.doi.org/10.1093/cercor/bhq296>  
775

776 Nunes, A. S., Peatfield, N., Vakorin, V., & Doesburg, S. M. (2018). Idiosyncratic organization of  
777 cortical networks in autism spectrum disorder. *Neuroimage*.  
778 doi:10.1016/j.neuroimage.2018.01.022  
779

780 Nomi, J. S., & Uddin, L. Q. (2015). Developmental changes in large-scale network connectivity  
781 in autism. *Neuroimage Clin*, 7, 732-741. <http://dx.doi.org/10.1016/j.nicl.2015.02.024>  
782

783 Perry, W., Minassian, A., Lopez, B., Maron, L., & Lincoln, A. (2007). Sensorimotor gating  
784 deficits in adults with autism. *Biol Psychiatry*, 61(4), 482-486.  
785 <http://dx.doi.org/10.1016/j.biopsych.2005.09.025>  
786

787 Picci, G., Gotts, S. J., & Scherf, K. S. (2016). A theoretical rut: revisiting and critically  
788 evaluating the generalized under/over-connectivity hypothesis of autism. *Dev Sci*, 19(4), 524-  
789 549. <http://dx.doi.org/10.1111/desc.12467>  
790

791 Power, J. D., Mitra, A., Laumann, T. O., Snyder, A. Z., Schlaggar, B. L., & Petersen, S. E.  
792 (2014). Methods to detect, characterize, and remove motion artifact in resting state fMRI.  
793 *Neuroimage*, 84, 320-341. <http://dx.doi.org/10.1016/j.neuroimage.2013.08.048>  
794

795 Rashid, B., Blanken, L. M. E., Muetzel, R. L., Miller, R., Damaraju, E., Arbabshirani, M. R., . . .  
796 Calhoun, V. (2018). Connectivity dynamics in typical development and its relationship to autistic  
797 traits and autism spectrum disorder. *Hum Brain Mapp*. doi:10.1002/hbm.24064  
798

799 Rudie, J. D., Brown, J. A., Beck-Pancer, D., Hernandez, L. M., Dennis, E. L., Thompson, P. M.,  
800 et al. (2013a). Altered functional and structural brain network organization in autism.  
801 *Neuroimage Clin*, 2, 79-94. <http://dx.doi.org/10.1016/j.nicl.2012.11.006>  
802

803 Rudie, J. D., & Dapretto, M. (2013b). Convergent evidence of brain overconnectivity in children  
804 with autism? *Cell Rep*, 5(3), 565-566. <http://dx.doi.org/10.1016/j.celrep.2013.10.043>  
805

806 Rudie, J. D., Shehzad, Z., Hernandez, L. M., Colich, N. L., Bookheimer, S. Y., Iacoboni, M., &  
807 Dapretto, M. (2012). Reduced functional integration and segregation of distributed neural  
808 systems underlying social and emotional information processing in autism spectrum disorders.  
809 *Cereb Cortex*, 22(5), 1025-1037. <http://dx.doi.org/10.1093/cercor/bhr171>  
810

811 Shen, M. D., Shih, P., Ottl, B., Keehn, B., Leyden, K. M., Gaffrey, M. S., & Muller, R. A.  
812 (2012). Atypical lexicosemantic function of extrastriate cortex in autism spectrum disorder:  
813 evidence from functional and effective connectivity. *Neuroimage*, 62(3), 1780-1791.  
814 <http://dx.doi.org/10.1016/j.neuroimage.2012.06.008>  
815

816 Spronk, M., Kulkarni, K., Ji, J.L., Keane, B., Anticevic, A., & Cole, M.W. (2018). A whole-  
817 brain and cross-diagnostic perspective on functional brain network dysfunction.  
818 bioRxiv 326728; doi: <https://doi.org/10.1101/326728>  
819

820 Turner, K. C., Frost, L., Linsenbardt, D., McIlroy, J. R., & Muller, R. A. (2006). Atypically  
821 diffuse functional connectivity between caudate nuclei and cerebral cortex in autism. *Behav*  
822 *Brain Funct*, 2, 34. <http://dx.doi.org/10.1186/1744-9081-2-34>  
823

824 Uddin, L. Q., Supekar, K., Lynch, C. J., Khouzam, A., Phillips, J., Feinstein, C., et al. (2013a).  
825 Salience network-based classification and prediction of symptom severity in children with  
826 autism. *JAMA Psychiatry*, 70(8), 869-879. <http://dx.doi.org/10.1001/jamapsychiatry.2013.104>  
827

- 828 Uddin, L. Q., Supekar, K., & Menon, V. (2013b). Reconceptualizing functional brain  
829 connectivity in autism from a developmental perspective. *Front Hum Neurosci*, 7, 458.  
830 <http://dx.doi.org/10.3389/fnhum.2013.00458>  
831
- 832 Weng, S. J., Wiggins, J. L., Peltier, S. J., Carrasco, M., Risi, S., Lord, C., & Monk, C. S. (2010).  
833 Alterations of resting state functional connectivity in the default network in adolescents with  
834 autism spectrum disorders. *Brain Res*, 1313, 202-214.  
835 <http://dx.doi.org/10.1016/j.brainres.2009.11.057>  
836
- 837 Whyatt, C., & Craig, C. (2013). Sensory-motor problems in Autism. *Front Integr Neurosci*, 7,  
838 51. <http://dx.doi.org/10.3389/fnint.2013.00051>  
839
- 840 Xu, T., Yang, Z., Jiang, L., Xing, X., & Zuo, X. (2015). A connectome computation system for  
841 discovery of brain science. *Sci Bull*, 60(1), 86-95. <http://dx.doi.org/10.1007/s11434-014-0698-3>  
842
